# Supplementary material for: Additive-free thick graphene film as an anode material for flexible lithium-ion batteries
Source: Royal Society of Chemistry journal article supplement (doi:10.1039/c4nr06082b), 2014-12-16
Supplement: c4nr06082b1.pdf [file c4nr06082b1.pdf]

## Supplementary Information

### Additive-Free Thick Graphene Film as an Anode Material for Flexible Lithium-Ion Batteries

Kuldeep Rana, Seong Dae Kim and Jong-Hyun Ahn\*

*<sup>a</sup>School of Electrical and Electronic Engineering, Yonsei University, Seoul, 120-749, Korea*

**Fig. S1** Optical images of (a) Ni surface after annealing at 1000 °C, shows the Ni-grain (b) Thick graphene surface grown over Ni-surface (c) SEM image of FSG surface after 50 charge/discharge cycles.

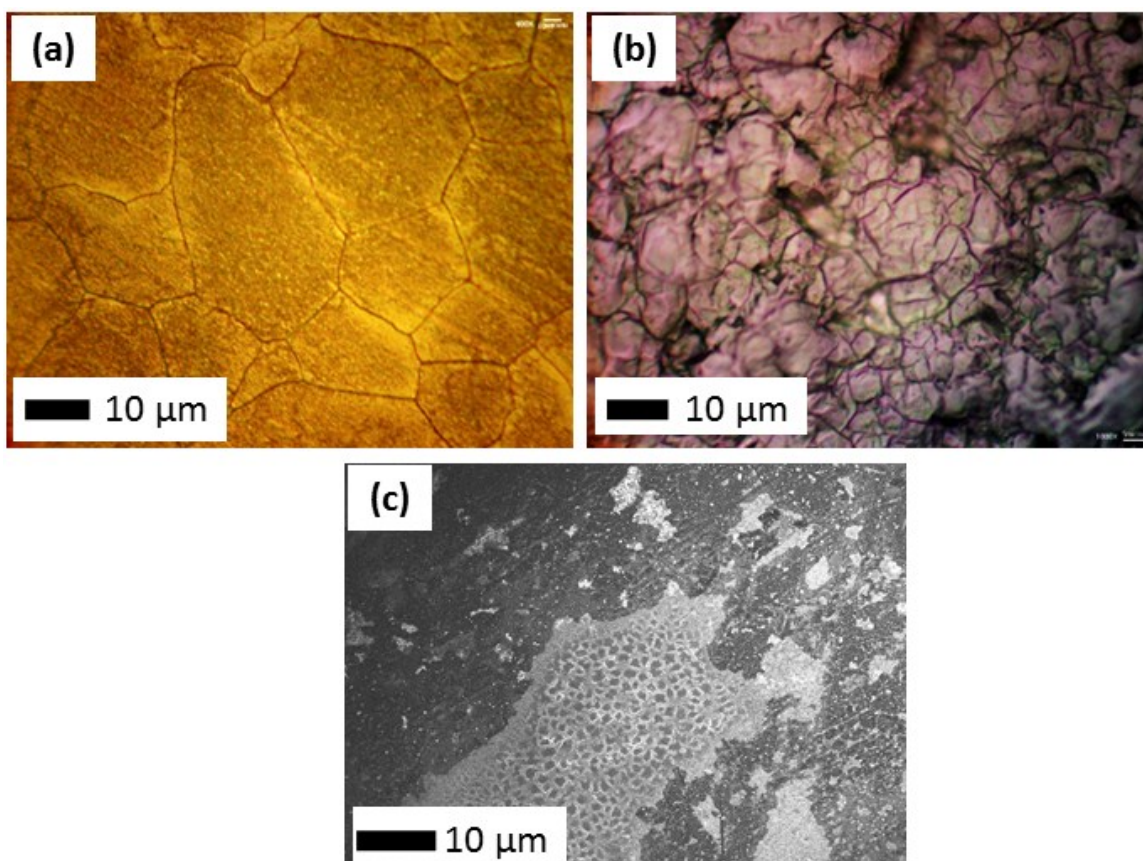

**Fig. S2** XRD of free standing graphene film and inset shows the zoomed area.

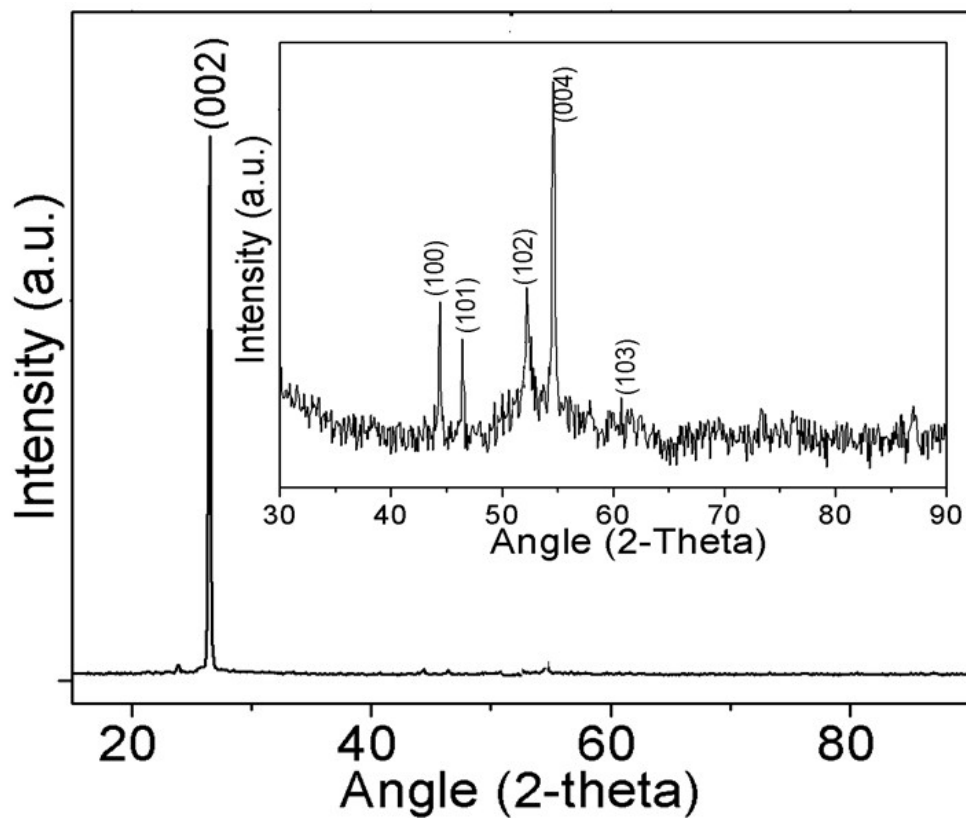

XRD pattern of FSG after Ni-etching in figure shows the pure 2H-graphitic crystal structure without any remaining impurities of Ni and all the peaks are indexed as a 2H-graphite with very good crystallinity.
